# Supplementary material
Source: PubMed Central journal article supplement (PMC9986923)

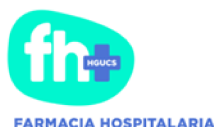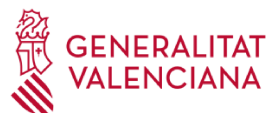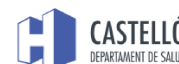

## ¿Qué es la Telefarmacia?

La telefarmacia es la **práctica farmacéutica a distancia**, que incluye las siguientes actividades:

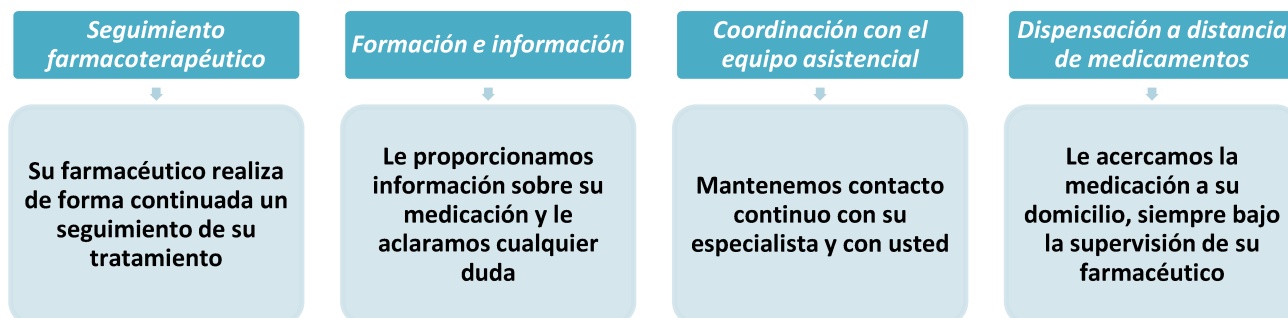

## ¿A quién va destinada la Telefarmacia?

El programa de telefarmacia va destinado a **pacientes crónicos que cumplen correctamente con su tratamiento**. Cualquier paciente que desee participar de un programa de telefarmacia será **valorado** previamente **por el farmacéutico para su inclusión**. Se valorará según los criterios establecidos.

En los casos en que su médico le cambie el tratamiento, deberá acudir al Servicio de Farmacia para realizar la atención farmacéutica de modo presencial y así recibir de modo directo la información sobre su nuevo tratamiento.

## ¿Cómo funciona la Telefarmacia en nuestro hospital?

Una vez incluido en el programa de telefarmacia, usted deberá firmar el **Consentimiento Informado** para permitirnos realizar la dispensación de su medicación a distancia y contactar con usted por vía telemática (teléfono o videollamada) cuando se considere oportuno. En todo momento se asegurará la confidencialidad de su tratamiento.

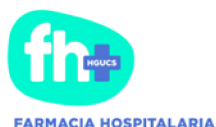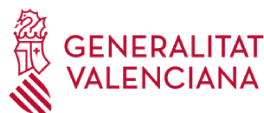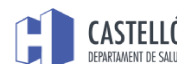

## Así nos organizamos desde el Servicio de Farmacia...

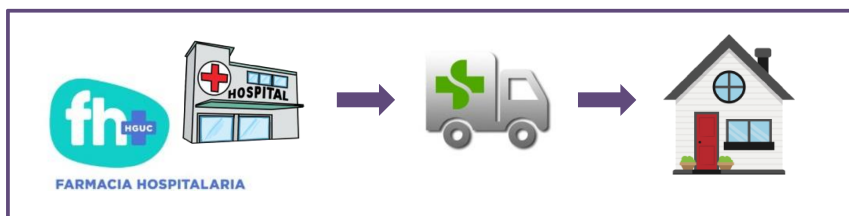

- **Organizamos la previsión del envío con antelación**, por ello siempre contactaremos con usted entre 1 o 2 semanas antes para confirmar el día del envío. 
- El día acordado del envío **recibirá un mensaje en su teléfono móvil** confirmando que su medicación ha sido recogida por la empresa de transporte en el **Servicio de Farmacia del Hospital**.
- El servicio de transporte le acercará la medicación al domicilio durante esa mañana en horario de 8:30h a 15:00h.
- Usted deberá firmar el **albarán de entrega en cada envío de la medicación**, para confirmar que la ha recibido en correctas condiciones.

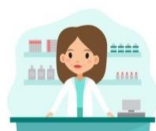

El **farmacéutico del Servicio de Farmacia Hospitalaria** podrá contactar con usted en cualquier momento para realizar **atención farmacéutica** y resolver cualquier duda sobre su medicación.

Cuando usted tenga que acudir al **hospital**, se le citará con nosotros para **recoger la medicación en la farmacia del hospital** ese mismo día tras la consulta médica.

*El Servicio de Farmacia podrá modificar el circuito en cualquier momento.  
Para cualquier duda contacte con nuestra unidad.*

Horario: **De LUNES a VIERNES de 8:30-20:30h**  
Teléfono:   
Correo: 

Supplement: ejhpharm-2021-003194supp001.pdf [file ejhpharm-2021-003194supp001.pdf]
