# Supplementary material
Source: PubMed Central journal article supplement (PMC9986923)
Supplement: ejhpharm-2021-003194supp002.pdf [file ejhpharm-2021-003194supp002.pdf]

## RESUMEN

### Objetivos

El presente trabajo tiene como objetivo describir las actuaciones realizadas para la implementación de un programa de Telefarmacia con dispensación y entrega informada de medicación a domicilio, en una Unidad de Atención Farmacéutica a Pacientes Externos de un hospital de tercer nivel, donde se atiende a aproximadamente 5.000 pacientes al año. Así como confirmar la aplicabilidad y beneficios de dicho programa mediante el análisis de los resultados obtenidos y la satisfacción de nuestros pacientes.

### Método

Se identificaron las necesidades operativas, logísticas, tecnológicas, legales, de formación e información y coordinación con el equipo asistencial y asociaciones de pacientes. Se elaboró un protocolo normalizado de trabajo en el que se detalló el modelo de dispensación a domicilio y el perfil de paciente candidato a Telefarmacia. Entre julio de 2020 y enero de 2021 se evaluó la actividad asistencial y se llevó a cabo una encuesta para medir la satisfacción de los pacientes basada en el proyecto Enopex.

### Resultados

El total de envíos de medicación fue de 2.536 durante 144 días laborables, con una media de 18 (DE: 6) envíos al día, realizándose 2.854 dispensaciones (1,1 fármacos por envío). Se enviaron 197 tipos de presentaciones farmacéuticas distintas correspondientes a 123 principios activos. La distancia y el tiempo evitados durante el período del estudio sumó 105.624 km y 109.452 minutos (76 días); siendo la mediana de distancia y tiempo ahorrados por paciente de 66 (RIQ:122) km y 90 (RIQ:90) minutos, lo que supone aproximadamente una reducción en la huella de carbono de 25 kg de CO<sub>2</sub> por paciente y 16,5 toneladas en total. La encuesta de satisfacción llevada a cabo en 134 pacientes reveló una elevada satisfacción de los pacientes atendidos con el servicio descrito en el estudio con 9,88 sobre 10.

### Conclusiones

La pandemia de COVID-19 ha supuesto una oportunidad para el Servicio de Farmacia de desarrollar e implementar un programa de Telefarmacia, en términos de beneficios para los pacientes, que ha permitido un entorno más organizado de la unidad y una mayor accesibilidad para los pacientes que acuden de forma presencial, y con una metodología aplicable y reproducible en otros Servicios de Farmacia de características y necesidades similares.

### Palabras claves

Telefarmacia, envío a domicilio, protocolo, farmacia hospitalaria, medicación hospitalaria.
